# Supplementary material for: Mapping axillary microbiota responsible for body odours using a culture-independent approach
Source: PubMed Central journal article supplement (PMC4316401; doi:10.1186/s40168-014-0064-3), 2015-01-24

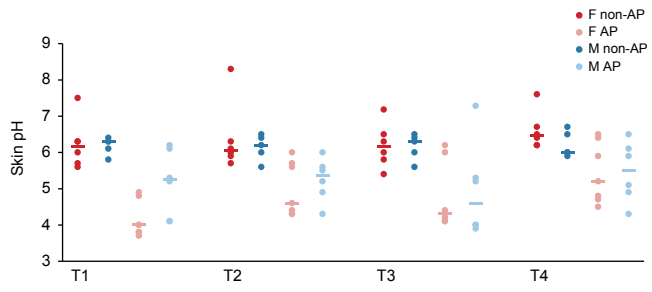

Supplement: 40168_2014_64_MOESM2_ESM.pdf [file 40168_2014_64_MOESM2_ESM.pdf]
